1 **Full-title**

2 Lack of parent-of-origin effects in *Nasonia jewel* wasp: a replication and extension study

3

4 **Short-title**

5 *Nasonia* parent-of-origin effects

6

7 **Authors**

8 Kimberly C. Olney<sup>1,2</sup>, Joshua D. Gibson<sup>3</sup>, Heini M. Natri<sup>2</sup>, Avery Underwood<sup>1,2</sup>, Juergen Gadau<sup>4</sup>,

9 Melissa A. Wilson<sup>1,2,5\*</sup>

10

11 **Affiliations**

12 1. School of Life Sciences, Arizona State University, Tempe AZ 85281 USA

13 2. Center for Evolution and Medicine, Arizona State University, Tempe AZ 85281 USA

14 3. Department of Biology, Georgia Southern University, Statesboro GA 30460 USA

15 4. Institut fuer Evolution and Biodiversity, University of Muenster, Muenster, Germany 48149

16 5. Center for Mechanisms of Evolution, The Biodesign Institute, Arizona State University, Tempe

17 AZ 85281 USA

18

19 **\*Corresponding author**

20 Melissa A. Wilson

21 School of Life Sciences | Arizona State University | PO Box 874501 | Tempe, AZ 85287-4501

22 [mwilsons@asu.edu](mailto:mwilsons@asu.edu)

23

24 **Author contributions**

25 KCO: Supervision, Formal Analysis, Investigation, Visualization, Writing - Original Draft

26 Preparation, Writing - Review and Editing

27 JDG: Conceptualization, Supervision, Formal Analysis, Investigation, Resources, Experimental  
28 Procedures, Writing - Original Draft Preparation, Writing - Review and Editing, Visualization  
29 HMN: Supervision, Formal Analysis, Investigation, Visualization, Writing - Original Draft  
30 Preparation, Writing - Review and Editing  
31 AU: Formal Analysis, Investigation, Writing - Review and Editing  
32 JG: Conceptualization, Funding acquisition, Supervision, Resources, Writing - Review and Editing  
33 MAW: Conceptualization, Supervision, Visualization, Resources, Project Administration, Writing  
34 - Original Draft Preparation, Writing - Review and Editing, Funding Acquisition

35

### 36 **Abbreviations**

37 Allele-specific expression (ASE)  
38 Differential expression (DE)  
39 Differentially expressed genes (DEGs)  
40 False discovery rate (FDR)  
41  $\log_2$  fold-change ( $\log_2FC$ )  
42 log counts per million (logCPM)  
43 *Nasonia giraulti* maternal and paternal (GG)  
44 *Nasonia vitripennis* maternal and paternal (VV)  
45 *N. giraulti* maternal, *N. vitripennis* paternal (GV) F<sub>1</sub>GV  
46 *N. vitripennis* maternal, *N. giraulti* paternal (VG) F<sub>1</sub>VG  
47 No difference (ND)  
48 RNA sequence (RNAseq)  
49 Standard deviation (SD)  
50 Variant call format (VCF)

## 51 **Abstract**

52 In diploid cells, the paternal and maternal alleles are, on average, equally expressed. There are  
53 exceptions from this: a small number of genes express the maternal or paternal allele copy  
54 exclusively. This phenomenon, known as genomic imprinting, is common among eutherian  
55 mammals and some plant species; however, genomic imprinting in species with haplodiploid sex  
56 determination is not well characterized. Previous work reported no parent-of-origin effects in the  
57 hybrids of closely related haplodiploid *Nasonia vitripennis* and *Nasonia giraulti* jewel wasps,  
58 suggesting a lack of epigenetic reprogramming during embryogenesis in these species. Here, we  
59 replicate the gene expression dataset and observations using different individuals and  
60 sequencing technology, as well as reproduce these findings using the previously published RNA  
61 sequence data following our data analysis strategy. The major difference from the previous  
62 dataset is that they used an introgression strain as one of the parents and we found several loci  
63 that resisted introgression in that strain. Our results from both datasets demonstrate a species-  
64 of-origin effect, rather than a parent-of-origin effect. We present a reproducible workflow that  
65 others may use for replicating the results. Overall, we reproduced the original report of no parent-  
66 of-origin effects in the haplodiploid *Nasonia* using the original data with our new processing and  
67 analysis pipeline and replicated these results with our newly generated data.

## 68 **Introduction**

69 Parent-of-origin effects occur when there is a biased expression (or completely monoallelic  
70 expression) of alleles inherited from the two parents [1,2]. Monoallelic gene expression in the  
71 offspring is hypothesized to be primarily the result of genetic conflict between parents over  
72 resource allocation in the offspring [3,4]. In mammals, the mechanism of these parent-of-origin  
73 effects occurs via inherited methylation of one allele [1,5]. In insects, the relationship between  
74 methylation of genomic DNA and the expression of the gene that it encodes is not as well

75 characterized but studies of social insects showed that there is a positive correlation of DNA  
76 methylation of gene bodies and gene expression [6].

77

78 Honey bees have been a focal group for investigation of parent-of-origin effects in insects due to  
79 differences in the kinship between queens, males, and workers [7,8]. Multiple mating by queens  
80 results in low paternal relatedness between workers and should lead to intragenomic conflict over  
81 worker reproduction (laying unfertilized eggs to produce males), and ultimately should favor the  
82 biased expression of paternal alleles that promote worker reproduction [9]. Utilizing a cross  
83 between European (*Apis mellifera ligustica*) and Africanized honey bees, Galbraith et al. 2016  
84 identified genes exhibiting a pattern of biased paternal allele overexpression in worker  
85 reproductive tissue from colonies that were queenless and broodless, a colony condition that  
86 promotes worker reproduction [9]. Smith et al. 2020 found a similar pattern of paternal allele  
87 overexpression in diploid (worker-destined) eggs in a cross between two African subspecies, *A.m.*  
88 *scutellate* and *A.m. capensis* [10]. In reciprocal crosses of European (*A.m. ligustica* and *A.m.*  
89 *carnica*) and Africanized honey bees reared in colonies containing both brood and a queen,  
90 Kocher et al. 2015 instead found parent-of-origin effects in gene expression that were largely  
91 overexpressing the maternal allele in both directions of the cross [11]. These studies provide  
92 evidence for parent-of-origin effects in the honey bee, a eusocial Hymenoptera. The Kocher et al.  
93 2016 dataset also exhibited asymmetric maternal allelic bias in which the paternal allele was  
94 silenced, but only in hybrids with Africanized fathers [12]. This set of biased genes was enriched  
95 for mitochondrial-localizing proteins and is overrepresented in loci associated with aggressive  
96 behavior in previous studies [13,14]. Interestingly, these same crosses exhibit high aggression in  
97 the direction of the cross with the Africanized father but not in the reciprocal cross [15], and  
98 aggression and brain oxidative metabolic rate appears to be linked in honey bees [16]. This study  
99 points toward a potential role of allelic bias and nuclear-mitochondrial genetic interactions in wide  
100 crosses of honey bees.

101

102 The parasitoid wasp genus *Nasonia* has emerged as an excellent model for studying genomic  
103 imprinting in Hymenoptera. Like honey bees and all Hymenoptera, *Nasonia* has a haplodiploid  
104 sex-determination system in which females are diploid, developing from fertilized eggs, and males  
105 are haploid, developing from unfertilized eggs. However, it serves as a strong contrast to studying  
106 parent-of-origin effects in the eusocial Hymenoptera as *Nasonia* is solitary and singly-mated,  
107 which should result in less genomic conflict and therefore less selective pressure for genomic  
108 imprinting based on kinship. By studying allelic expression biases in this system, we can better  
109 assess genomic imprinting in the absence of kin selection and the potential contribution of  
110 nuclear-mitochondrial interactions to biased allelic expression. *Nasonia* is well-suited for these  
111 kinds of studies as two closely related species of *Nasonia* - *N. vitripennis* and *N. giraulti* - that  
112 diverged ~1 million years ago (Mya) and show a synonymous coding divergence of ~3% [17], can  
113 still produce viable and fertile offspring [18]. Highly inbred laboratory populations of *N. vitripennis*  
114 and *N. giraulti* with reduced polymorphism provide an ideal system for identifying parent-of-origin  
115 effects in hybrid offspring [19]. However, the species do show genetic variation and  
116 incompatibilities, such that recombinant F2 males (from unfertilized eggs of F1 hybrid females)  
117 suffer asymmetric hybrid breakdown in which 50% to 80% of the offspring die during development  
118 [18]. The mortality is dependent on the direction of the cross and those with *N. giraulti* maternity  
119 (cytoplasm) have the highest level of mortality. Nuclear-mitochondrial incompatibilities have been  
120 implicated in this and candidate loci have been identified [20–22]. Despite this high level of  
121 mortality in F2 males, there is no obvious difference in mortality of the F1 mothers of these males  
122 and non-hybrid females, further highlighting this as an excellent system in which to test the  
123 potential role of allelic expression bias in mitigating hybrid dysfunction.

124

125 Wang et al. 2016 used genome-wide DNA methylation and transcriptome-wide gene expression  
126 data from 11 individuals to test whether differences in DNA methylation drive the differences in

127 gene expression between *N. vitripennis* and *N. giraulti*, and whether there are any parent-of-origin  
128 effects (parental imprinting and allele-specific expression) [19]. They used reciprocal crosses of  
129 these two species and found no parent-of-origin effects, suggesting a lack of genomic imprinting.  
130 Unlike the work in honey bees, however, there have not been multiple independent investigations  
131 of evidence for parent-of-origin effects in *Nasonia*.

132  
133 Reproducibility is a major concern in science, particularly for the biological and medical sciences  
134 [23,24]. To replicate is to make an exact copy. To reproduce is to make something similar to  
135 something else. Reports have shown that significant factors contributing to irreproducible  
136 research include selective reporting, unavailable code and methods, low statistical power, poor  
137 experimental design, and raw data not available from the original lab [23,25,26]. In RNAseq  
138 experiments, raw counts are transformed into gene or isoform counts, which requires an *in silico*  
139 bioinformatics pipeline [27]. These pipelines are modular and parameterized according to the  
140 experimental setup [27]. The choice of software, parameters used, and biological references can  
141 alter the results. In RNAseq, filters can also improve the robustness of differential expression calls  
142 and consistency across sites and platforms [28]. There is no, and there may never be, a defined  
143 optimal RNAseq processing pipeline from raw sequencing files to meaningful gene or isoform  
144 counts. Thus, the same data can be processed in a multitude of ways by the choice of software,  
145 parameters, and references used [27]. Given the exact same inputs, software, and parameters,  
146 one can reproduce the analysis if the authors provide this documentation and make explicit the  
147 information related to the data transformation used to the RNAseq data [27]. In the case of the  
148 Wang et al. 2016, the methods and experimental design were exceptionally well documented,  
149 and the authors made available their raw data [19].

150  
151 To address whether the Wang et al. 2016 findings of lack of parent-of-origin effects in *Nasonia*  
152 may be replicated and reproduced, we conducted two sets of analyses. We first downloaded the

153 raw data from 11 individuals [19] and replicated differential expression (DE) and allele-specific  
154 expression (ASE) analyses. This allowed us to characterize species differences in gene  
155 expression, hybrid effects relative to each maternal and paternal line, and possible parent-of-  
156 origin effects using new alignment methods and software. Second, we reproduced the  
157 experimental setup with new individuals, generated transcriptome-wide expression levels of 12  
158 *Nasonia* individuals (parental strains and reciprocal hybrids), named here as the Wilson data  
159 using similar, but not identical strains as the Wang et al. 2016 samples, which we named as the  
160 R16A Clark data. The Wilson data, reported here, used the standard *N. giraulti* strain (RV2Xu).  
161 The R16A Clark *N. giraulti* differs from the RV2Xu strain in that it has a nuclear *N. giraulti* genome  
162 introgressed into a *N. vitripennis* cytoplasm which harbour *N. vitripennis* mitochondria. Both  
163 studies used the same highly inbred standard *N. vitripennis* strain, ASymCx. We completed the  
164 above analyses to test for robust reproducibility in biased allele and parent-of-origin effects in  
165 *Nasonia*. In this analysis, we processed both the R16A Clark and Wilson data using the same  
166 software and thresholds, starting with the raw FASTQ files. While we detect some differences in  
167 the specific differentially expressed genes between the two datasets, our study reproduces and  
168 confirms the main conclusions of the Wang et al. 2016 study: we observe similar trends in the DE  
169 and ASE genes, and we detect no parent-of-origin effects in *Nasonia* hybrids, indicating a  
170 validation of the lack of epigenetic reprogramming during embryogenesis in this taxa [19]. We  
171 make available the bioinformatics processing and analysis pipeline used for both the R16A Clark  
172 and Wilson datasets for easily replicating the results reported here:  
173 <https://github.com/SexChrLab/Nasonia>. Finally, during the process of reproducing these results,  
174 we extend them to show potential interactions between the mtDNA and autosomal genome that  
175 were not apparent in the original study.

## 176 **Results**

### 177 **Samples cluster by species and hybrid in R16A Clark and Wilson datasets**

178 We used Principal Component Analysis (PCA) of gene expression data to explore the overall  
179 structure of the two datasets, R16A Clark and Wilson. Although the reciprocal hybrids from the  
180 two datasets are slightly different **Fig 1B**, in both sets, samples from the two species (strains)  
181 form separate clusters, with the clustering of the hybrid samples between them **Fig 2A**. The first  
182 PC explains most of the gene expression variation in both datasets, with proportions of variance  
183 explained 58.17% in R16A Clark and 61.69% in the Wilson data. Further, despite differences in  
184 experimental protocols, the transcriptome-wide gene expression measurements across the  
185 different crosses and species are highly correlated between the R16A Clark and Wilson dataset,  
186 **Fig 3**. There is a difference in the mean RNAseq library size between the two datasets. The mean  
187 RNAseq library size for the R16A Clark samples is 48,893,872 base pairs (bp) (SD=11,603,536)  
188 and the Wilson samples is 16,518,955 bp (SD=3,205,303), **S1 Table**. Overall, we observe that  
189 most of the variation in the data is explained by species and hybrids.



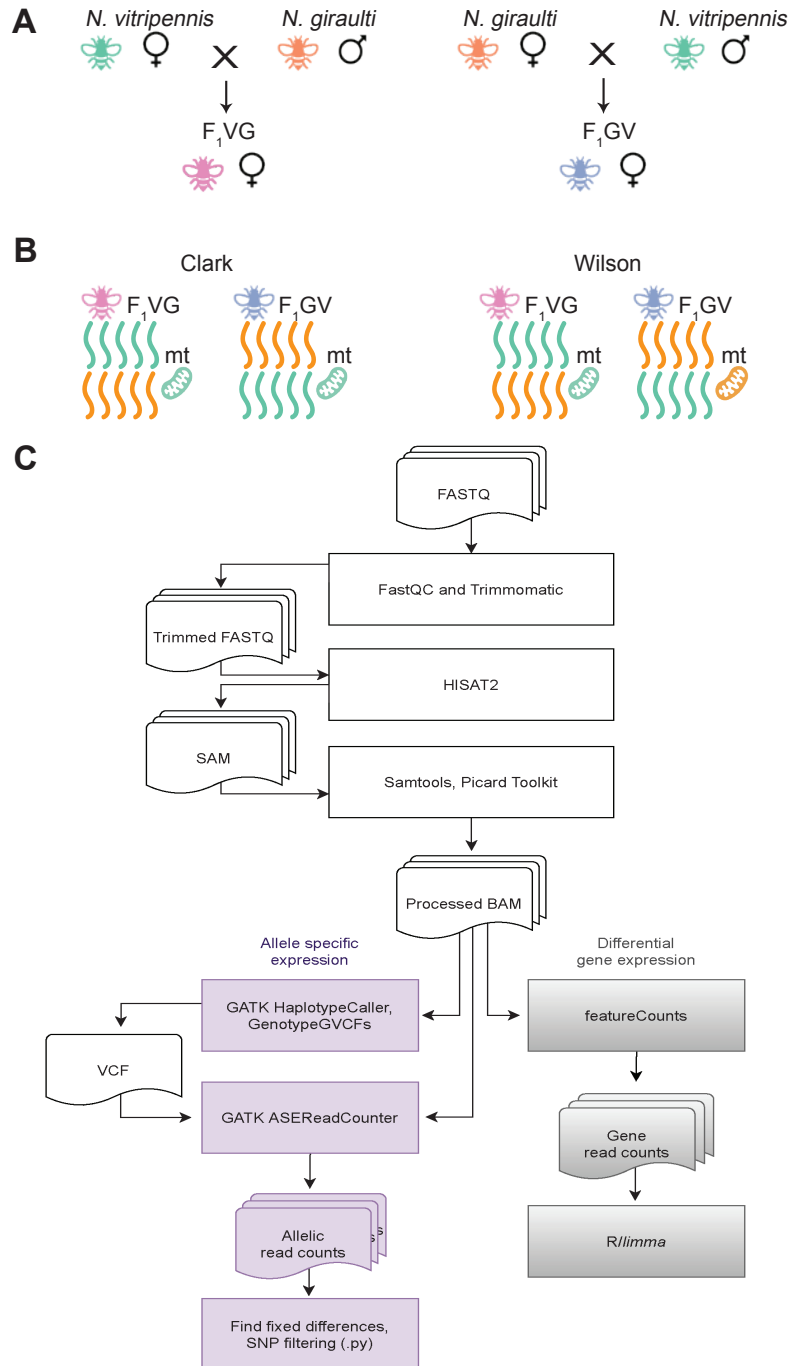

190

191 **Fig 1. A:** A schematic illustration of the reciprocal  $F_1$  crosses. **B:** Schematic illustration of the  
 192 hybrids nuclear and mitochondrial genomic make up. All hybrids are heterozygous at every  
 193 nuclear locus for their two parent's alleles. The R16A Clark hybrids have *N. vitripennis*  
 194 mitochondria, regardless of maternal species. The Wilson hybrids have their maternal species  
 195 mitochondria. **C:** Overview of the data processing and analysis workflow.

196

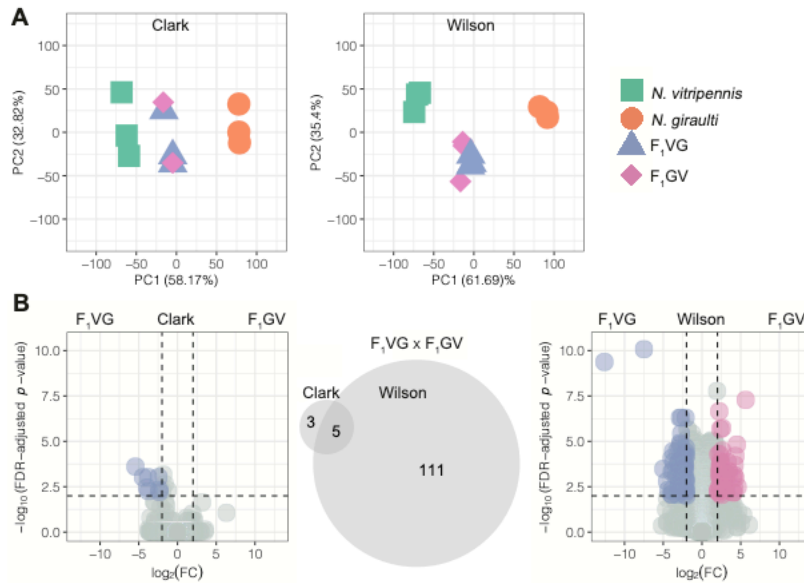

197

198 **Fig 2. A:** Gene expression PCA based on all expressed genes (mean FPKM  $\geq 0.5$  across three  
199 biological replicates in at least one sample group) in the R16A Clark and Wilson datasets when  
200 taking the average between the *N. vitripennis* and pseudo *N. giraulti* reference genomes. **B:**  
201 Volcano plots of differentially expressed genes between the two reciprocal hybrids in the R16A  
202 Clark and Wilson datasets. Significance thresholds of an FDR-adjusted  $p$ -value  $\leq 0.01$  and an  
203 absolute  $\log_2\text{FC} \geq 2$  are indicated. A Venn diagram shows the overlap of the significant DEGs.

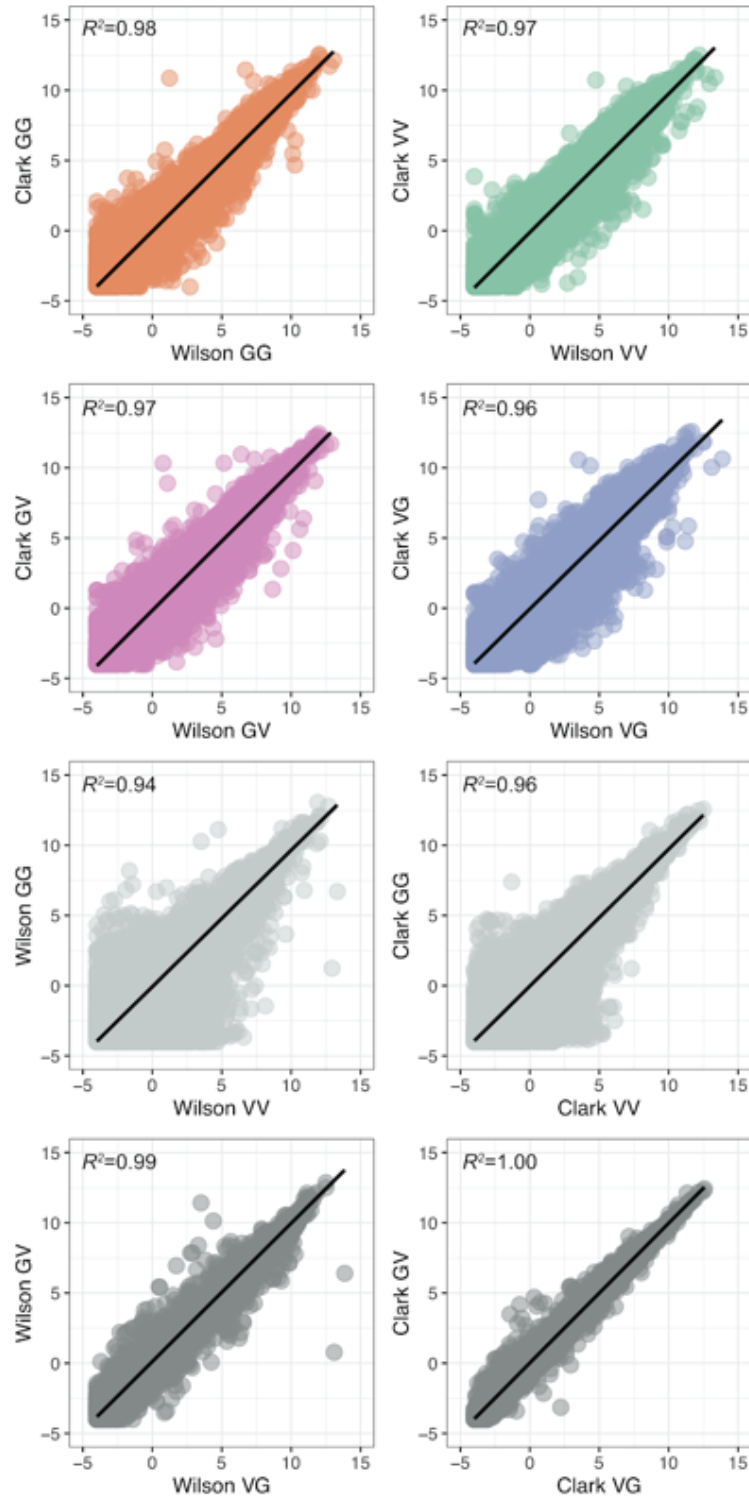

204

205 **Fig 3.** Gene expression correlation between the Wilson and R16A Clark datasets, as well as

206 between species and between reciprocal hybrids within each dataset. Mean logCPM expression

207 of each quantified gene in each cross and dataset is shown. Pearson's correlation  $R^2$  is indicated.

208 **Species and hybrid differences in gene expression between closely related *N.***  
209 ***vitripennis* and *N. giraulti***

210 We detect more differentially expressed genes (DEGs) in the Wilson dataset despite the smaller  
211 library sizes, particularly in the comparison involving the hybrid samples (**Fig 2B**). We called  
212 DEGs,  $FDR \leq 0.01$ , and absolute  $\log_2$  fold change  $\geq 2$ , between the different species and crosses  
213 within both datasets (**Fig 2B and S1 Fig**). In the *N. vitripennis* (VV) x *N. giraulti* (GG) comparison,  
214 we identify 799 and 1,001 DEGs in the R16A Clark and Wilson datasets, respectively. We observe  
215 a 45.5% overlap of these DEGs between the datasets (**S1 Fig**). As expected, we detect fewer  
216 DEGs in the comparisons involving the hybrids (**Fig 1B**). We detect only small differences in the  
217 numbers of DEGs called in the R16A Clark and Wilson datasets when examining hybrid effects  
218 relative to each maternal line (**S1 Fig**). However, these DEGs show little overlap between the  
219 datasets, with the proportions of overlapping DEGs in VVxVG, VVxGV, GGxVG, and GGxGV,  
220 comparisons being 24.1%, 16.2%, 39%, and 31.6%, respectively.

221  
222 There is a notable difference in the number of DEGs called between VG and GV hybrids between  
223 the R16A Clark and Wilson datasets. The R16A Clark data used an introgression strain of *N.*  
224 *giraulti*, R16A, that has a nuclear genome derived from *N. giraulti* but maintains *N. vitripennis*  
225 mitochondria, therefore the R16A Clark hybrids all have the same genetic makeup whereas the  
226 Wilson reciprocal hybrids have the same nuclear genome but different cytoplasm; yet, we do  
227 see eight genes called as differentially expressed between the VG and GV hybrids in the R16A  
228 Clark data. Three of the eight genes in the R16A Clark data (LOC116416025, LOC116416106,  
229 LOC116417553) were only called as differentially expressed between the VG and GV hybrids in  
230 the R16A Clark dataset and weren't called as differentially expressed in the Wilson dataset. The  
231 other five genes (LOC107981401, LOC100114950, LOC116415892, LOC103317241,  
232 LOC107981942) were called as differentially expressed between the VG and GV in both datasets.

233 In the Wilson data, we called 116 DEGs, 111 of which are uniquely to the Wilson data set. The  
234 original Wang et al. 2016 publication did not investigate differential expression between the  
235 hybrids [19]. Here we report a new way of looking at the data, and despite the same genetic  
236 makeup between the hybrids in the R16A Clark data, we do observe differential expression  
237 between the hybrids, and five of those eight genes are also called as differentially expressed in  
238 the Wilson data.

239 Four (LOC107981401, LOC100114950, LOC116415892, and LOC103317241) out of the  
240 five DEGs shared between the data sets are uncharacterized proteins located on Chr 1, Chr 2,  
241 and Chr 4. To gain insight into the possible functions of these genes, we used NCBI's BLASTp  
242 excluding *Nasonia* [29,30] to find regions of similarity between these sequences and  
243 characterized sequences. We observe several significant hits to different insects including  
244 *Drosophila* suggesting that these proteins have at least some conservation in insects over > 300  
245 million years. The fifth shared DEG, LOC107981942, located on chromosome 1, is annotated as  
246 a zinc finger BED domain-containing protein 1. An NCBI Conserved Domain Search  
247 (<https://www.ncbi.nlm.nih.gov/Structure/cdd/wrpsb.cgi>) using these protein sequences uncovered  
248 no significant hits with LOC100114950, LOC116415892, and LOC103317241. However,  
249 LOC107981401 and LOC107981942 show significant hits for transposase domain superfamilies  
250 cl24015 and cl04853, respectively. The role of these proteins in *Nasonia* remains unclear.

## 251 **Lack of Parent-of-Origin effects in *Nasonia* hybrids**

252 We used allele-specific expression (ASE) analyses to detect parent-of-origin effects — indicated  
253 by allelic bias — in *Nasonia* hybrids. The inference of genomic imprinting for each dataset was  
254 limited to those sites that meet our filtering criteria (see Methods). We find 107,206 and 115,490  
255 sites to be fixed and different between VV and GG samples, in the R16A Clark and Wilson  
256 datasets, respectively. Limiting the analysis to only fixed and different sites, there are 6,377 and  
257 7,164 genes with at least 2 informative SNPs in the reciprocal hybrids in the R16A Clark data set

258 and Wilson datasets, respectively. Using this approach, we find no evidence of genomic imprinting  
259 in whole adult female samples of *Nasonia* in the R16A Clark data (**Fig 4A**). But for the Wilson  
260 data we found two genes that show a pattern of expression consistent with genomic imprinting:  
261 CPR35 and LOC103315494. In the VG hybrid, CPR35 shows a bias towards the paternally  
262 inherited *N. giraulti* allele at an allele ratio of 65.3% and in the GV hybrid towards the paternally  
263 inherited *N. vitripennis* allele, with an allele ratio of 62% (**S2 Table**). CPR35 is a cuticular protein  
264 in the RR family member 35. Similarly, LOC103315494 shows bias towards the paternally  
265 inherited allele with allele ratios of 65.26% and 61.58% in VG and GV, respectively (**S2 Table**).  
266 Although both imprinted genes, *CPR35* and *LOC103315494*, fall below the mean depth and  
267 average number of SNPs per gene, both genes are above the thresholds applied here (**S3 Table**).

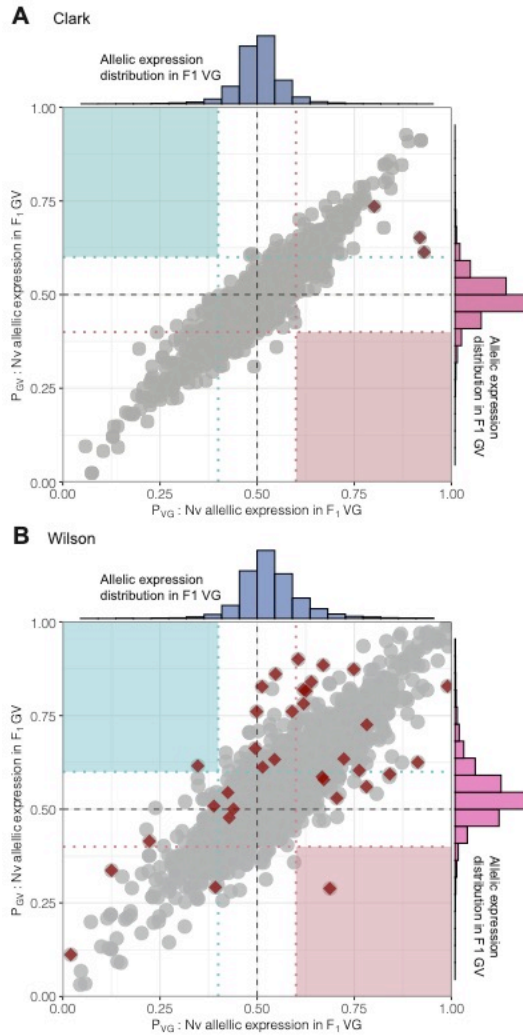

268

269 **Fig 4.** Scatterplots of the expression of the *N. vitripennis* alleles in the two reciprocal hybrids, VG  
270 (x-axis) and GV (y-axis), in the R16A Clark (A) and Wilson (B) datasets. Genes with at least two  
271 informative SNPs with a minimum depth of 30 were used (R16A Clark = 6,377, Wilson = 7,164).  
272 Genes exhibiting a significant difference in allelic bias between the hybrids (Fisher's exact test,  
273 FDR-adj.  $p < 0.05$ ) are highlighted in red. Paternally imprinted genes are expected to appear in the  
274 upper left corner (light blue box), and maternally imprinted genes in the lower right corner (light  
275 pink box). Histograms of the *N. vitripennis* allele expression are shown for VG (blue) and GV  
276 (pink).

## 277 **Allele-specific expression differences in *Nasonia* hybrids**

278 We find three genes with higher expression of the *N. vitripennis* allele in both hybrids, in both  
279 datasets, indicative of *cis*-regulatory effects. The genes LOC100123729, LOC100123734, and  
280 LOC100113683 show consistent differences in allelic expression between VG and GV hybrids  
281 (FDR- $p \leq 0.05$ ) in both datasets, but the ratio of the *N. vitripennis* allele differs between the hybrids  
282 (**S2 Table**). In the R16A Clark dataset: LOC100123729 in the VG hybrids the *N. vitripennis* allele  
283 accounts for 93% of the reads, whereas in the GV hybrids this ratio is 61%. In the Wilson dataset,  
284 both hybrids showed higher expression of the *N. vitripennis* allele. In the Wilson data, the *N.*  
285 *vitripennis* allele ratio was 61% in VG and 90% in GV. LOC100123729 is located on chromosome  
286 2 and encodes the protein Nasonin-3, which plays a role in inhibiting host insect melanization  
287 [31]. Also on chromosome 2 is LOC100123734, annotated as cadherin-23, which is involved in  
288 cell attachment by interacting with other proteins in the cell membrane. Both hybrids in both  
289 datasets show a higher expression for the *N. vitripennis* allele for LOC100123734. In the R16A  
290 Clark data, the ratio of the *N. vitripennis* allele in VG was 92% and in GV 65%. In the Wilson data,  
291 the VG hybrids showed less expression for the *N. vitripennis* allele than the GV hybrids, at a ratio  
292 of 64% and 84% of the reads, respectively. Finally, LOC100113683, which is located on  
293 chromosome 4, and is annotated as a general odorant-binding protein 56d also shows more  
294 expression for the *N. vitripennis* allele in both datasets and both hybrids (80.13% and 73.54% for  
295 VG and GV in R16A Clark, 78.22% and 72.57% in Wilson). Odorant binding proteins are thought  
296 to be involved in the stimulation of the odorant receptors by binding and transporting odorants  
297 which activate the olfactory signal transduction pathway [32].

## 298 **R16A strain retains *N. vitripennis* alleles**

299 R16A is a strain produced by backcrossing an *N. vitripennis* female to an *N. giraulti* male and  
300 repeating that for 16 generations [18]. This should give a complete *N. giraulti* nuclear genome



301 with *N. vitripennis* mitochondria. However, we identified two regions in the R16A strain that still  
302 show *N. vitripennis* alleles and named them R16A non-introgressed locus 1 and R16A non-  
303 introgressed locus 2 (**S4 Table**). Each region is identified by a single marker that retains the *N.*  
304 *vitripennis* allele. Locus 1 contains 44 genes and Locus 2 contains 14 genes. Both of these  
305 regions are found on Chromosome 1, and Locus 2 lies within the confidence intervals of the  
306 mortality locus for *N. vitripennis* maternity hybrids identified by Niehuis et al. 2008 [21] (i.e., F2  
307 recombinant hybrids with a *N. vitripennis* cytoplasm showed a significant transmission ratio  
308 distortion at this region favoring the *N. vitripennis* allele). R16 A non-introgressed locus 1 harbors  
309 a mitochondrial ribosomal gene (39 S ribosomal protein 38) which is a good candidate gene for  
310 causing its retention in R16A despite intensive introgression. It would also explain the observed  
311 nuc-cytoplasmic effect in F2 recombinant males in a vitripennis cytoplasm, despite the fact that  
312 R16A was used as a giraulti parental line in Gadau et al. (1999) [20]. Gadau et al. interestingly  
313 also mapped one of the nuc-cytoplasmic incompatibility loci to chromosome 1 (called LG1 in the  
314 manuscript) [20]. Mutations in mitochondrial ribosomal proteins in humans have severe effects  
315 [33].

### 316 **Expression of genes in regions associated with hybrid mortality or nuclear-** 317 **mitochondrial incompatibility**

318 We compared the location of genes with either significant differential gene expression or  
319 significant differences in allele-specific expression between VG and GV hybrids to the location of  
320 previously identified mortality-associated loci. Three of the five genes that were called as  
321 differentially expressed between VG and GV hybrids in both the R16A Clark and Wilson data sets  
322 (**S5 Table**) are located within mortality associated loci. LOC103317241 is located within a locus  
323 on Chr 2 that is associated with mortality in VG hybrids, and LOC107981401 and LOC100114950  
324 are within a locus on Chr 4 that is associated with mortality in GV hybrids. Moreover, two of the

325 three genes showing consistent allele-specific expression in the two data sets are located near  
326 one another in the mortality-associated locus on Chr. 2 (LOC100123729 and LOC100123734).  
327 None of the genes that are differentially expressed or that exhibit allele-specific expression are  
328 located within the 2 loci that retain the *N. vitripennis* genotype in the R16A Clark strain, nor did  
329 we find any overlap of these gene sets with either the oxidative phosphorylation or the  
330 mitochondrial ribosomal proteins.

## 331 **Discussion**

332 We successfully replicate the findings from Wang et al. 2016, showing a lack of parent-of-origin  
333 effects in *Nasonia* transcriptomes [19]. This replication occurs independently in a different  
334 laboratory, with different *Nasonia* individuals derived from a slightly different cross, different  
335 bioinformatic pipelines, and sequencing technology. Our results from both the reanalyzed R16A  
336 Clark and Wilson datasets could only demonstrate a species-of-origin effect but no parent-of-  
337 origin effect within *Nasonia* F1 female hybrids, which may have explained the lack of mortality in  
338 the F1 females relative to the F2 recombinant hybrid males. The larger number of differentially  
339 expressed genes between the two parental species in our study relative to the Wang et al (2016)  
340 [19] (1001 vs 799) is most likely the result of using a standard *N. giraulti* strain (RV2Xu) rather  
341 than an introgression strain (R16A) where the nuclear genome of *N. giraulti* was introgressed into  
342 a *N. vitripennis* cytoplasm. Additionally, we found genomic regions that resisted introgression in  
343 the R16A *Nasonia* strains utilized by Wang et al. 2016 [19]. Furthermore, we present a  
344 reproducible workflow for processing raw RNA sequence samples to call differential expression  
345 and allele-specific expression openly available on the GitHub page:  
346 <https://github.com/SexChrLab/Nasonia>.

347

## 348 **Differences between the R16A Clark and Wilson datasets**

349 The primary difference between the R16A Clark cross and the Wilson cross is the *N. giraulti* strain  
350 choice **Fig 1B**. The new crosses presented here used the strain Rv2X(u), which is a pure *N.*  
351 *giraulti* strain that was used for sequencing the genome [17]. Wang et al. 2016 used an  
352 introgression strain, R16A, which has a largely *N. giraulti* nuclear genome with an *N. vitripennis*  
353 cytoplasm [19]. This strain was produced by mating an *N. vitripennis* female with an *N. giraulti*  
354 male, and then repeatedly backcrossing the strain to *N. giraulti* males for a further 15 generations  
355 [18]. Hence, both sets of hybrids should be heterozygous at every nuclear locus for species  
356 specific markers (though see above for two non-introgressed regions); however, both reciprocal  
357 R16A Clark hybrids have *N. vitripennis* mitochondria while the new hybrids have their maternal  
358 species' mitochondria. This means that in addition to looking at parent-of-origin effects, our new  
359 crosses are uniquely suited to investigate allelic expression biases in the context of nuclear-  
360 mitochondrial incompatibility and hybrid dysfunction.

### 361 **Observed differences in hybrids between data sets**

362 We observe substantially more DEGs between the hybrids, VG and GV, in the Wilson data set  
363 compared to the R16A Clark data set. The smaller number of DEGs detected in the R16A Clark  
364 data in this particular comparison is likely partially due to the one excluded F<sub>1</sub>GV sample (see  
365 Materials and methods). Another likely contributing factor is the differences in one parental strain  
366 between the Wilson and R16A Clark data sets. The Wilson data presented here consist of inbred  
367 parental *N. vitripennis* (strain AsymCX) VV and *N. giraulti* (strain RV2Xu) GG lines, and reciprocal  
368 F<sub>1</sub> crosses. This cross differs from the R16A Clark data, which used the same *N. vitripennis* strain  
369 but rather than a normal *N. giraulti* strain they used the introgression strain, R16A, that has a  
370 nuclear genome derived from *N. giraulti* and a cytoplasm/mitochondria derived from *N. vitripennis*  
371 (see R16A section). Despite these differences, of the eight genes that are differentially expressed  
372 between the VG and GV hybrids. five are shared between both data sets. Although we were not  
373 specifically looking for this, we found that three of the five genes showing differential expression

374 in both data sets as well as two of the three genes showing allele (species)-specific expression in  
375 both data sets are located in previously identified loci that are associated with the observed F2  
376 recombinant male hybrid breakdown from the same crosses [20,21]. These findings point towards  
377 an involvement of cis regulatory elements in the genetic architecture of the F2-hybrid male  
378 breakdown in *Nasonia*. The finding that, despite using different strains of wasps, we are still able  
379 to identify genes associated with these hybrid defects, which bolsters our confidence in further  
380 pursuing these genes in our investigation of the genetic architecture of hybrid barriers in *Nasonia*.

### 381 **The choice of reference and tools does not alter main findings**

382 The authors of the Wang et al. 2016 paper used different computational tools for trimming and  
383 alignment than the current study [19]. Additionally, in Wang et al. 2016, the RNAseq reads were  
384 aligned to both an *N. vitripennis* and *N. giraulti* reference genome [19]; whereas here, we created  
385 a pseudo *N. giraulti* reference genome from the fixed and differentiated sites between the inbred  
386 *N. vitripennis* and *N. giraulti* parental lines. Often, different tools and statistical approaches result  
387 in different findings [34,35]; however, despite different approaches, we observe the same pattern  
388 as what was originally reported in Wang et al. 2016 [19], a lack of parent-of-origin expression in  
389 *Nasonia*.

### 390 **A reproducible workflow for investigating genomic imprinting**

391 Significant factors contributing to irreproducible research include selective reporting, unavailable  
392 code and methods, low statistical power, poor experimental design, and raw data not available  
393 from the original lab [23]. We replicate a robust experimental design (current study) initially  
394 presented in the Wang et al. (2016) [19] and present a new workflow for calling DE and ASE in  
395 those two independent but analog *Nasonia* datasets. Both datasets are publicly available for  
396 download on the short read archive (SRA) PRJNA260391 and PRJNA613065, respectively. In  
397 our analyses of the Wilson data and reanalysis of the R16A data, we corroborated the original

398 findings from Wang et al. 2016 [19]. There are no parent-of-origin effects in *Nasonia*. All  
399 dependencies for data processing are provided as a Conda environment, allowing for seamless  
400 replication. All code is openly available on GitHub <https://github.com/SexChrLab/Nasonia>.

## 401 **Materials and methods**

### 402 ***Nasonia vitripennis* and *Nasonia giraulti* inbred and reciprocal F1 hybrid datasets**

403 RNA sequence (RNAseq) samples for 4 female samples each from parental species, *N.*  
404 *vitripennis* (VV) and *N. giraulti* (GG), and from each reciprocal F1 cross (F<sub>1</sub>VG, female hybrids  
405 with *N. vitripennis* mothers, and F<sub>1</sub>GV, female hybrids with *N. giraulti* mothers), as shown in **Fig**  
406 **1A**, were obtained from a 2016 publication [19] from SRA PRJNA299670. We refer to the data  
407 from [19] as R16A Clark. One F<sub>1</sub>GV RNAseq sample from the R16A Clark dataset (SRR2773798)  
408 was excluded due to low quality, as in the original publication [19].

409  
410 The newly generated crosses consisted of 12 RNAseq samples of inbred isofemale lines of  
411 parental *N. vitripennis* (strain AsymCX) VV and *N. giraulti* (strain RV2Xu) GG lines, and reciprocal  
412 F1 crosses F<sub>1</sub>VG, and F<sub>1</sub>GV. (**Fig 1A**). Whole transcriptome for these samples is available on  
413 SRA PRJNA613065. This cross differs from the R16A Clark data, which used the same *N.*  
414 *vitripennis* strain but rather than a standard *N. giraulti* strain used an introgression strain, R16A,  
415 that has a nuclear genome derived from *N. giraulti* and a cytoplasm/mitochondria derived from *N.*  
416 *vitripennis* (see R16A section below) **Fig 1B**. Total RNA was extracted from a pool of four 48 hour  
417 post-eclosion adult females using a Qiagen RNeasy Plus Mini kit (Qiagen, CA). RNA-seq libraries  
418 were prepared with 2µg of total RNA using the Illumina Stranded mRNA library prep kit and were  
419 sequenced on a HiSeq2500 instrument following standard Illumina protocols. Three biological  
420 replicates were generated for each parent and hybrid, with 100-bp paired-end reads per replicate.

421 Sample IDs, parent cross information, and SRA bioproject accession numbers for R16A Clark  
422 and Wilson datasets are listed in **S1 Table**.

### 423 **Quality control**

424 Raw sequence data from both datasets were processed and analyzed according to the workflow  
425 presented in **Fig 1C**. The quality of the FASTQ files was assessed before and after trimming using  
426 FastQC v0.11 [36] and MultiQC v1.0 [37]. Reads were trimmed to remove bases with a quality  
427 score less than 10 for the leading and trailing stand, applying a sliding window of 4 with a minimum  
428 mean PHRED quality of 15 in the window and a minimum read length of 80 bases, and adapters  
429 were removed using Trimmomatic v0.36 [38]. Pre- and post-trimming multiQC reports for the  
430 R16A Clark and Wilson datasets are available on the GitHub page:  
431 <https://github.com/SexChrLab/Nasonia>.

### 432 **Variant calling**

433 For variant calling, BAM files were preprocessed by adding read groups with Picard's  
434 AddOrReplaceReadGroups and by marking duplicates with Picard's MarkDuplicates  
435 (<https://github.com/broadinstitute/picard>). Variants were called using GATK [39–41] and the  
436 scatter-gather approach: Sample genotype likelihoods were called with HaplotypeCaller minimum  
437 base quality of 2. The resulting gVCFs were merged with CombineGVCFs, and joint genotyping  
438 across all samples was carried out with GenotypeGVCFs with a minimum confidence threshold  
439 of 10.

### 440 **Pseudo *N. giraulti* reference genome assembly**

441 To create a pseudo *N. giraulti* reference genome, fixed differences in the homozygous *N. giraulti*  
442 and *N. vitripennis* variant call file (VCF) files were identified using a custom Python script,

443 available on the GitHub page: <https://github.com/SexChrLab/Nasonia>. Briefly, a site was  
444 considered to be fixed and different if it was homozygous for the *N. vitripennis* reference allele  
445 among all three of the biological VV samples and homozygous alternate among all three of the  
446 biological GG samples. Only homozygous sites were included, as the *N. giraulti* and *N. vitripennis*  
447 lines are highly inbred. The filtered sites were then used to create a pseudo *N. giraulti* reference  
448 sequence with the FastaAlternateReferenceMaker function in GATK version 3.8 (available at:  
449 <http://www.broadinstitute.org/gatk/>). Reference bases in the *N. vitripennis* genome were replaced  
450 with the alternate SNP base at variant positions. Following a similar protocol for comparison, we  
451 now aligned reads in each sample to the pseudo *N. giraulti* genome reference with HISAT2  
452 version 2.1.0, and performed identical preprocessing steps prior to variant calling with GATK  
453 version 3.8 HaplotypeCaller.

#### 454 **RNAseq alignment and gene expression level quantification**

455 Trimmed sequence reads were mapped to the NCBI *N. vitripennis* reference genome (assembly  
456 accession GCF\_009193385.2), as well as the pseudo *N. giraulti* reference using HISAT2 [42].  
457 The resulting SAM sequence alignment files were converted to BAM, and coordinates were sorted  
458 and indexed with samtools 1.8 [43]. RNAseq read counts were quantified from the *N. vitripennis*  
459 as well as the custom *N. giraulti* alignments using Subread featureCounts [44] with the *N.*  
460 *vitripennis* gene annotation.

#### 461 **Inference of differential gene expression**

462 Differential expression (DE) analyses were carried out by linear modeling as implemented in the  
463 R package *limma* [45]. An average of the reads mapped to each gene in the *N. vitripennis* and  
464 the pseudo *N. giraulti* genome references were used in the DE analyses. Counts were filtered to  
465 remove lowly expressed genes by retaining genes with a mean FPKM  $\leq 0.5$  in at least one sample  
466 group (VV, GG, VG, or GV). Normalization of expression estimates was accomplished by

467 calculating the trimmed mean of M-values (TMM) with edgeR [46]. The voom method [47] was  
468 then employed to normalize expression intensities by generating a weight for each observation.  
469 Gene expression is then reported as log counts per million (logCPM). Gene expression correlation  
470 between datasets and between species within each dataset was assessed using Pearson's  
471 correlation of mean logCPM values of each gene. Dimensionality reduction of the filtered and  
472 normalized gene expression data was carried out using scaled and centered PCA with the  
473 *prcomp()* function of base R. Differential expression analysis with voom was carried out for each  
474 pairwise comparison between strains (VV, GG, VG, and GV) for each data set. We identified  
475 genes that exhibited significant expression differences with an adjusted *p*-value of  $\leq 0.01$  and an  
476 absolute  $\log_2$  fold-change ( $\log_2FC$ )  $\leq 2$ .

#### 477 **Analysis of allele-specific expression in reciprocal F1 hybrids**

478 Allele-specific expression (ASE) levels were obtained using GATK ASEReadCounter [40] with a  
479 minimum mapping quality of 10, minimum base quality of 2, and a minimum depth of 30. Only  
480 sites with a fixed difference between inbred VV and GG for both R16A Clark and Wilson datasets  
481 were used for downstream analysis of allele-specific expression. Allele counts obtained from  
482 GATK ASEReadCounter were intersected with the *N. vitripennis* gene annotation file using  
483 bedtools version 2.24.0 [48]; the resulting output contained allele counts for each SNP and  
484 corresponding gene information. The F1 hybrids' allele counts with gene information was read  
485 into R and then filtered to only include genes with at least two SNPs with minimum depth of 30.  
486 We counted the number of allele-counts for the reference allele (*N. vitripennis*) and alternative (*N.*  
487 *giraulti*) allele at polymorphic SNP positions. We quantified the number of SNPs in each hybrid  
488 replicate that 1) showed a bias towards the allele that came from the *N. vitripennis* parent, 2)  
489 showed a bias towards the allele that came from the *N. giraulti* parent, and 3) showed no  
490 difference (ND) in an expression of its parental alleles. The significance of allelic bias was  
491 determined using Fisher's exact test. Significant genes were selected using a Benjamini-



492 Hochberg false discovery rate FDR-adjusted  $p$ -value threshold of 0.05. As *Nasonia* are  
493 haplodiploid, all ASE analyses were carried out on the diploid female hybrids.

#### 494 **Identifying loci associated with hybrid mortality**

495 *Nasonia* recombinant F2 hybrid males (haploid sons of F1 female hybrids) suffer mortality during  
496 development that differs between VG and GV hybrids [18]. Niehuis et al. 2008 identified four  
497 genomic regions associated with this mortality (i.e., regions in which one parent species' alleles  
498 are underrepresented due to mortality during development); three are associated with mortality in  
499 hybrids with *N. vitripennis* maternity and one is associated with hybrids with *N. giraulti* maternity  
500 [21]. Gibson et al. 2013 later identified a second locus related to mortality in the hybrids with *N.*  
501 *giraulti* maternity [22]. Given that the F2 hybrid females analyzed here experience far less  
502 mortality than their haploid male offspring, we hypothesized that these diploid females may use  
503 biased allelic expression to rescue themselves from the mortality. To compare our results with  
504 these previous studies, we had to map the previous loci to the latest *Nasonia* assembly (PSR1.1,  
505 [49]). Niehuis et al. 2008 defined their candidate loci based on the genetic distance along the  
506 chromosome (centimorgans) [21]. The physical locations of the markers along the chromosomes  
507 were later identified by Niehuis et al. 2010 [50]. Using the genetic distances between these  
508 markers in both the 2008 and 2010 Niehuis *et al.* studies [21,50], we calculated the conversion  
509 ratio between the genetic distances in these two studies (**S6 Table**). We then converted those  
510 2008 genetic distances that correspond to the 95% Confidence Intervals for these loci to the  
511 genetic distances reported by Niehuis et al. 2010 [50], which used an Illumina Goldengate  
512 Genotyping Array (Illumina Inc., San Diego, USA) to produce a more complete and much higher  
513 resolution genetic map of *Nasonia*. This array uses Single Nucleotide Polymorphisms (SNPs) to  
514 genotype samples at ~1500 loci, which allowed us to identify SNP markers that closely bound the  
515 mortality loci from the 2008 study. Gibson et al. 2013 used the same genotyping array, so this  
516 conversion was unnecessary for converting the second mortality locus in *N. giraulti* maternity

517 hybrids [22]. We used the 100bp of sequence flanking each SNP marker to perform a BLAST  
518 search of the PSR1.1 assembly and to identify their positions. We then used all of the PSR1.1  
519 annotated genes within these loci to look for enrichment of genes showing biased expression.  
520 Mortality loci and genomic location are reported in **S4 Table**.

### 521 **Additional gene categories of interest**

522 Previous work has identified potential classes of genes that may be involved in nuclear-  
523 mitochondrial incompatibilities in *Nasonia*, the oxidative phosphorylation genes [51] and the  
524 mitochondrial ribosomal proteins [52]. We used the annotated gene sets from these studies to  
525 test for enrichment of genes with biased allelic expression. Lists of the genes of interest and their  
526 genomic location is reported in **S4 Table**.

### 527 **Analysis of R16A strain**

528 In order to assess whether the introgression of the *N. giraulti* nuclear genome into the R16A Clark  
529 strain is complete, we analyzed two samples of the R16A strain using the Illumina Goldengate  
530 Genotyping Array used in Niehuis *et al.* 2010 [50]. We searched for SNP markers that retained  
531 the *N. vitripennis* allele and only considered markers that consistently identified the proper allele  
532 in both parent species controls and that were consistent across both R16A samples, leaving 1378  
533 markers. We defined a locus as all of the sequences between the two markers that flank a marker  
534 showing the *N. vitripennis* allele (**S2 Table**). As above, we performed a BLAST search of the  
535 PSR1.1 assembly to identify the positions of these markers. We identified all genes from the  
536 PSR1.1 assembly that lie between the flanking markers and further analyzed their expression  
537 patterns.

538

539 Scripts and gene lists used to analyze these data are publicly available on GitHub,  
540 <https://github.com/SexChrLab/Nasonia>.

## 541 **Acknowledgments**

542 The authors acknowledge Research Computing at Arizona State University for providing HPC  
543 resources that have contributed to the research results reported within this paper.

## 544 **Funding Disclosure**

545 ARCS Spetzler Scholar additionally supported KCO. HMN was supported by an ASU Center for  
546 Evolution and Medicine postdoctoral fellowship. MAW was supported by the National Institute of  
547 General Medical Sciences (NIGMS) of the National Institutes of Health (NIH) grant  
548 R35GM124827. JDG was supported by the Division of Integrative Organismal Systems (IOS) of  
549 the National Science Foundation (NSF) grant 1145509 and by research funds provided by  
550 Georgia Southern University. JG was in part supported by a grant from the German Research  
551 Foundation (DFG) to N.S. (281125614/GRK2220, Project B7). The funders had no role in study  
552 design, data collection and analysis, decision to publish, or preparation of the manuscript.

553

## 554 **Supplemental Data**

555 **S1 Fig. Volcano plots for differential expression and venn diagram of DEGs between the**  
556 **datasets when taking the average of the counts when aligned to *N. vitripennis* and to**  
557 **pseudo *N. giraulti* reference genome.** Volcano plots of DEGs detected between the different  
558 comparisons involving *N. vitripennis*, *N. giraulti*, and the two reciprocal F<sub>1</sub> hybrids in the R16A  
559 Clark (left side) and Wilson (right side) datasets. Venn diagrams of the overlap of significant DEGs  
560 in each comparison is shown.

561  
562 **S1 Table. Sample identifiers.** The samples for each dataset used in the project are provided  
563 here. Samples from this study are uploaded at <https://www.ncbi.nlm.nih.gov/sra/PRJNA613065>.

564  
565 **S2 Table. Allele-specific expression differences between hybrids.** The number of allele-  
566 counts for the reference allele (*N. vitripennis*) and alternative (*N. giraulti*) allele at polymorphic  
567 SNPs within a gene. Minimum of two SNPs for a gene to be included. The significance of allelic  
568 bias was determined using Fisher's exact test. Significant genes were selected using a Benjamini-  
569 Hochberg false discovery rate FDR-adjusted *p*-value threshold of 0.05.

570  
571 **S3 Table. Mean and median allele and gene depth for Wilson dataset.** Mean and median  
572 allele and gene depth for each GV and VG sample in the Wilson data set. Number of SNPs for all  
573 genes, *CPR35*, and *LOC103315494*.

574  
575 **S4 Table. Genomic location of mortality loci and gene sets of interest.** Previously reported  
576 loci associated with mortality in *Nasonia* hybrids. 95% Confidence Intervals of loci identified in  
577 Niehuis et al. 2008 were converted to genetic distances along the chromosomes and the closest  
578 SNP markers from Niehuis et al. 2010 were identified [21,50]. SNP markers for the locus identified

579 in Gibson et al. 2013 were used directly [22]. The SNP marker locations in the PSR1.1 assembly  
580 were found via BLAST and all genes within the bounds of these markers are included. The two  
581 non-introgressed regions from the R16A strain are included as well as genes from two  
582 mitochondria-associated pathways, the oxidative phosphorylation pathway [51] and the  
583 mitochondrial ribosomal proteins [52].

584

585 **S5 Table. Directional bias of differentially expressed genes between VG and GV in Clark**  
586 **and Wilson datasets.** Five genes that were called as differentially expressed between VG and  
587 GV hybrids in both the Clark and Wilson data sets.

588

589 **S6 Table. Locus conversion calculations.** Calculations for converting the genetic map  
590 positions (centimorgan, cM) of mortality loci identified by Niehuis et al. 2008 to the physical  
591 chromosomal positions of the latest genome assembly (PSR1.1) [21].

592

## 593 **References**

- 594 1. Reik W, Walter J. Genomic imprinting: parental influence on the genome. *Nature Reviews*  
595 *Genetics*. 2001. pp. 21–32. doi:10.1038/35047554
- 596 2. Ishida M, Moore GE. The role of imprinted genes in humans. *Mol Aspects Med*. 2013;34:  
597 826–840.
- 598 3. Isles AR, Davies W, Wilkinson LS. Genomic imprinting and the social brain. *Philos Trans R*  
599 *Soc Lond B Biol Sci*. 2006;361: 2229–2237.
- 600 4. Moore T, Haig D. Genomic imprinting in mammalian development: a parental tug-of-war.  
601 *Trends Genet*. 1991;7: 45–49.
- 602 5. Lawson HA, Cheverud JM, Wolf JB. Genomic imprinting and parent-of-origin effects on  
603 complex traits. *Nat Rev Genet*. 2013;14: 609–617.
- 604 6. Yan H, Bonasio R, Simola DF, Liebig J, Berger SL, Reinberg D. DNA methylation in social  
605 insects: how epigenetics can control behavior and longevity. *Annu Rev Entomol*. 2015;60:  
606 435–452.
- 607 7. Queller DC. Theory of genomic imprinting conflict in social insects. *BMC Evol Biol*. 2003;3:  
608 15.
- 609 8. Haig D. Intragenomic conflict and the evolution of eusociality. *J Theor Biol*. 1992;156: 401–  
610 403.
- 611 9. Galbraith DA, Kocher SD, Glenn T, Albert I, Hunt GJ, Strassmann JE, et al. Testing the  
612 kinship theory of intragenomic conflict in honey bees (*Apis mellifera*). *Proc Natl Acad Sci U*  
613 *S A*. 2016;113: 1020–1025.
- 614 10. Smith NMA, Yagound B, Remnant EJ, Foster CSP, Buchmann G, Allsopp MH, et al.  
615 Paternally-biased gene expression follows kin-selected predictions in female honey bee  
616 embryos. *Mol Ecol*. 2020;29: 1523–1533.
- 617 11. Kocher SD, Tsuruda JM, Gibson JD, Emore CM, Arechavaleta-Velasco ME, Queller DC, et  
618 al. A Search for Parent-of-Origin Effects on Honey Bee Gene Expression. *G3*. 2015;5:  
619 1657–1662.
- 620 12. Gibson JD, Arechavaleta-Velasco ME, Tsuruda JM, Hunt GJ. Biased Allele Expression and  
621 Aggression in Hybrid Honeybees may be Influenced by Inappropriate Nuclear-Cytoplasmic  
622 Signaling. *Frontiers in Genetics*. 2015. doi:10.3389/fgene.2015.00343
- 623 13. Hunt GJ, Guzmán-Novoa E, Fondrk MK, Page RE Jr. Quantitative trait loci for honey bee  
624 stinging behavior and body size. *Genetics*. 1998;148: 1203–1213.
- 625 14. Hunt GJ. Flight and fight: A comparative view of the neurophysiology and genetics of honey  
626 bee defensive behavior. *J Insect Physiol*. 2007;53: 399–410.
- 627 15. Shorter JR, Arechavaleta-Velasco M, Robles-Rios C, Hunt GJ. A Genetic Analysis of the  
628 Stinging and Guarding Behaviors of the Honey Bee. *Behavior Genetics*. 2012. pp. 663–

- 629            674. doi:10.1007/s10519-012-9530-5
- 630    16. Alaux C, Sinha S, Hasadsri L, Hunt GJ, Guzmán-Novoa E, DeGrandi-Hoffman G, et al.  
631        Honey bee aggression supports a link between gene regulation and behavioral evolution.  
632        Proc Natl Acad Sci U S A. 2009;106: 15400–15405.
- 633    17. Werren JH, Richards S, Desjardins CA, Niehuis O, Gadau J, Colbourne JK, et al.  
634        Functional and evolutionary insights from the genomes of three parasitoid *Nasonia* species.  
635        Science. 2010;327: 343–348.
- 636    18. Breeuwer JAJ, Werren JH. HYBRID BREAKDOWN BETWEEN TWO HAPLODIPLOID  
637        SPECIES: THE ROLE OF NUCLEAR AND CYTOPLASMIC GENES. *Evolution*. 1995;49:  
638        705–717.
- 639    19. Wang X, Werren JH, Clark AG. Allele-Specific Transcriptome and Methylome Analysis  
640        Reveals Stable Inheritance and Cis-Regulation of DNA Methylation in *Nasonia*. *PLOS*  
641        *Biology*. 2016. p. e1002500. doi:10.1371/journal.pbio.1002500
- 642    20. Gadau J, Page RE Jr, Werren JH. Mapping of hybrid incompatibility loci in *Nasonia*.  
643        *Genetics*. 1999;153: 1731–1741.
- 644    21. Niehuis O, Judson AK, Gadau J. Cytonuclear genic incompatibilities cause increased  
645        mortality in male F2 hybrids of *Nasonia giraulti* and *N. vitripennis*. *Genetics*. 2008;178: 413–  
646        426.
- 647    22. Gibson JD, Niehuis O, Peirson BRE, Cash EI, Gadau J. Genetic and developmental basis  
648        of F2 hybrid breakdown in *Nasonia* parasitoid wasps. *Evolution*. 2013;67: 2124–2132.
- 649    23. Baker M. 1,500 scientists lift the lid on reproducibility. *Nature*. 2016. pp. 452–454.  
650        doi:10.1038/533452a
- 651    24. Casadevall A, Fang FC. Reproducible science. *Infect Immun*. 2010;78: 4972–4975.
- 652    25. Baker M. Irreproducible biology research costs put at \$28 billion per year. *Nature*.  
653        2015;533. Available: [http://www.target-biomed.de/resources/Irreproducible-biology-](http://www.target-biomed.de/resources/Irreproducible-biology-research.pdf)  
654        [research.pdf](http://www.target-biomed.de/resources/Irreproducible-biology-research.pdf)
- 655    26. Freedman LP, Inglese J. The Increasing Urgency for Standards in Basic Biologic Research.  
656        *Cancer Research*. 2014. pp. 4024–4029. doi:10.1158/0008-5472.can-14-0925
- 657    27. Simoneau J, Dumontier S, Gosselin R, Scott MS. Current RNA-seq methodology reporting  
658        limits reproducibility. *Brief Bioinform*. 2019. doi:10.1093/bib/bbz124
- 659    28. Su Z, Łabaj PP, Li S, Thierry-Mieg J, Thierry-Mieg D, Shi W, et al. A comprehensive  
660        assessment of RNA-seq accuracy, reproducibility and information content by the  
661        Sequencing Quality Control Consortium. *Nat Biotechnol*. 2014;32: 903–914.
- 662    29. Johnson M, Zaretskaya I, Raytselis Y, Merezhuk Y, McGinnis S, Madden TL. NCBI BLAST:  
663        a better web interface. *Nucleic Acids Research*. 2008. pp. W5–W9. doi:10.1093/nar/gkn201
- 664    30. NCBI Resource Coordinators, NCBI Resource Coordinators. Database Resources of the  
665        National Center for Biotechnology Information. *Nucleic Acids Research*. 2017. pp. D12–  
666        D17. doi:10.1093/nar/gkw1071

- 667 31. Tian C, Wang L, Ye G, Zhu S. Inhibition of melanization by a *Nasonia* defensin-like peptide:  
668 implications for host immune suppression. *J Insect Physiol.* 2010;56: 1857–1862.
- 669 32. He Y, Wang K, Zeng Y, Guo Z, Zhang Y, Wu Q, et al. Analysis of the antennal  
670 transcriptome and odorant-binding protein expression profiles of the parasitoid wasp  
671 *Encarsia formosa*. *Genomics.* 2020. pp. 2291–2301. doi:10.1016/j.ygeno.2019.12.025
- 672 33. Sylvester JE, Fischel-Ghodsian N, Mougey EB, O'Brien TW. Mitochondrial ribosomal  
673 proteins: candidate genes for mitochondrial disease. *Genet Med.* 2004;6: 73–80.
- 674 34. Schaarschmidt S, Fischer A, Zuther E, Hinch DK. Evaluation of Seven Different RNA-Seq  
675 Alignment Tools Based on Experimental Data from the Model Plant *Arabidopsis thaliana*.  
676 *Int J Mol Sci.* 2020;21. doi:10.3390/ijms21051720
- 677 35. Del Fabbro C, Scalabrin S, Morgante M, Giorgi FM. An extensive evaluation of read  
678 trimming effects on Illumina NGS data analysis. *PLoS One.* 2013;8: e85024.
- 679 36. Andrews S. FastQC: A Quality Control Tool for High Throughput Sequence Data [Online].  
680 Online. 2010. Available: <http://www.bioinformatics.babraham.ac.uk/projects/fastqc/>
- 681 37. Ewels P, Magnusson M, Lundin S, Källér M. MultiQC: summarize analysis results for  
682 multiple tools and samples in a single report. *Bioinformatics.* 2016;32: 3047–3048.
- 683 38. Bolger AM, Lohse M, Usadel B. Trimmomatic: a flexible trimmer for Illumina sequence data.  
684 *Bioinformatics.* 2014;30: 2114–2120.
- 685 39. Van der Auwera GA, Carneiro MO, Hartl C, Poplin R, Del Angel G, Levy-Moonshine A, et  
686 al. From FastQ data to high confidence variant calls: the Genome Analysis Toolkit best  
687 practices pipeline. *Curr Protoc Bioinformatics.* 2013;43: 11.10.1–33.
- 688 40. McKenna A, Hanna M, Banks E, Sivachenko A, Cibulskis K, Kernytzky A, et al. The  
689 Genome Analysis Toolkit: a MapReduce framework for analyzing next-generation DNA  
690 sequencing data. *Genome Res.* 2010;20: 1297–1303.
- 691 41. DePristo MA, Banks E, Poplin R, Garimella KV, Maguire JR, Hartl C, et al. A framework for  
692 variation discovery and genotyping using next-generation DNA sequencing data. *Nat*  
693 *Genet.* 2011;43: 491–498.
- 694 42. Kim D, Langmead B, Salzberg SL. HISAT: a fast spliced aligner with low memory  
695 requirements. *Nat Methods.* 2015;12: 357–360.
- 696 43. Li H, Handsaker B, Wysoker A, Fennell T, Ruan J, Homer N, et al. The Sequence  
697 Alignment/Map format and SAMtools. *Bioinformatics.* 2009;25: 2078–2079.
- 698 44. Liao Y, Smyth GK, Shi W. featureCounts: an efficient general purpose program for  
699 assigning sequence reads to genomic features. *Bioinformatics.* 2014;30: 923–930.
- 700 45. Ritchie ME, Phipson B, Wu D, Hu Y, Law CW, Shi W, et al. limma powers differential  
701 expression analyses for RNA-sequencing and microarray studies. *Nucleic Acids Res.*  
702 2015;43: e47.
- 703 46. Robinson MD, McCarthy DJ, Smyth GK. edgeR: a Bioconductor package for differential  
704 expression analysis of digital gene expression data. *Bioinformatics.* 2010;26: 139–140.



- 705 47. Law CW, Chen Y, Shi W, Smyth GK. voom: precision weights unlock linear model analysis  
706 tools for RNA-seq read counts. *Genome Biol.* 2014;15: R29.
- 707 48. Quinlan AR, Hall IM. BEDTools: a flexible suite of utilities for comparing genomic features.  
708 *Bioinformatics.* 2010. pp. 841–842. doi:10.1093/bioinformatics/btq033
- 709 49. Benetta ED, Antoshechkin I, Yang T, Nguyen HQM, Ferree PM, Akbari OS. Genome  
710 Elimination Mediated by Gene Expression from a Selfish Chromosome.  
711 doi:10.1101/793273
- 712 50. Niehuis O, Gibson JD, Rosenberg MS, Pannebakker BA, Koevoets T, Judson AK, et al.  
713 Recombination and its impact on the genome of the haplodiploid parasitoid wasp *Nasonia*.  
714 *PLoS One.* 2010;5: e8597.
- 715 51. Gibson JD, Niehuis O, Verrelli BC, Gadau J. Contrasting patterns of selective constraints in  
716 nuclear-encoded genes of the oxidative phosphorylation pathway in holometabolous  
717 insects and their possible role in hybrid breakdown in *Nasonia*. *Heredity* . 2010;104: 310–  
718 317.
- 719 52. Burton RS, Barreto FS. A disproportionate role for mtDNA in Dobzhansky-Muller  
720 incompatibilities? *Molecular Ecology.* 2012. pp. 4942–4957. doi:10.1111/mec.12006
